# Supplementary material for: Prediction of promoters and enhancers using multiple DNA methylation-associated features
Source: PubMed Central journal article supplement (PMC4474542; doi:10.1186/1471-2164-16-s7-s11), 2015-06-11
Supplement: 1471-2164-16-S7-S11-S1.pdf [file 1471-2164-16-S7-S11-S1.pdf]

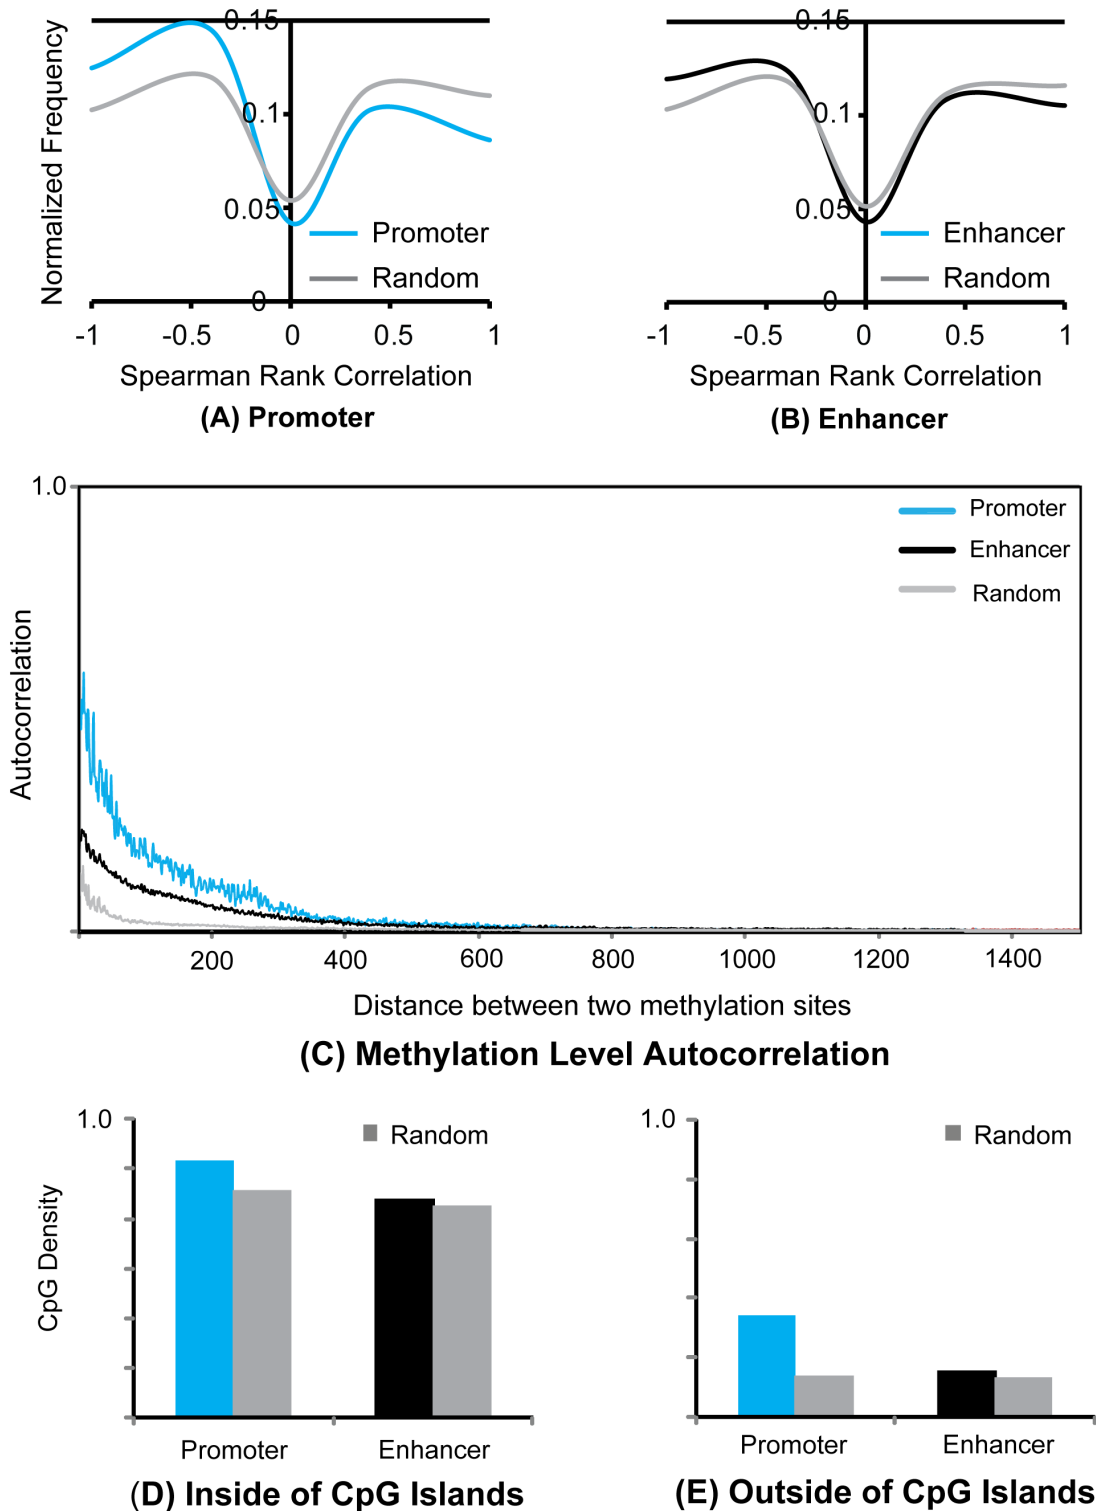

**Figure S1** (A-B) Spearman's rank correlation between methylation level of a mCpG and its target gene's expression for promoters and enhancers. (C) Autocorrelation of methylation levels between two mCpGs in regulatory regions and random regions for further distance (1500bp). (D-E) CpG density of the regions inside and outside of CpG islands.
