# Supplementary material for: Prediction of promoters and enhancers using multiple DNA methylation-associated features
Source: PubMed Central journal article supplement (PMC4474542; doi:10.1186/1471-2164-16-s7-s11), 2015-06-11
Supplement: 1471-2164-16-S7-S11-S5.pdf [file 1471-2164-16-S7-S11-S5.pdf]

| Motif    | p-value   | Logo | TF       |
|----------|-----------|------|----------|
| AAGCGCAA | <<1.0E-15 |      | HNF4     |
| GCGCGGCC | <<1.0E-15 |      | E2F      |
| CGCCGGGA | <<1.0E-15 |      | AP2      |
| AATCGGCT | <<1.0E-15 |      | GATA1    |
| CTCCGGTC | <<1.0E-15 |      | AP4      |
| CCGCGCTC | <<1.0E-15 |      | E2F      |
| CGCCGAG  | <<1.0E-15 |      | AP2ALPHA |
| ATTCGGCC | <<1.0E-15 |      | AIRE     |
| CCGCGCCG | <<1.0E-15 |      | E2F      |
| ACCCGAAT | <<1.0E-15 |      | PPARA    |
| AAACGGCG | <<1.0E-15 |      | MYB      |
| AATCGGGT | <<1.0E-15 |      | VDR      |
| GCGCGAGC | <<1.0E-15 |      | E2F1     |
| CGGCGCAC | <<1.0E-15 |      | HNF4     |
| CGCCGAAG | <<1.0E-15 |      | E2F      |
| CCGCGGAA | <<1.0E-15 |      | NRSE     |
| CGTCGGAA | <<1.0E-15 |      | ELK1     |
| CGCCGTAA | <<1.0E-15 |      | ELK1     |
| GCGCGAAA | <<1.0E-15 |      | E2F4DP1  |
| AGCCGAAG | 2.3E-13   |      | PU1      |

(A) Active Promoter

| Motif    | p-value   | Logo | TF       |
|----------|-----------|------|----------|
| AGCCGCTG | <<1.0E-15 |      | AP4      |
| CAGCGGCC | <<1.0E-15 |      | AP4      |
| CCACGAGA | <<1.0E-15 |      | HES1     |
| CTGCGTCC | <<1.0E-15 |      | WHN      |
| CTCCGCAG | <<1.0E-15 |      | NRSE     |
| AGGCGGCC | <<1.0E-15 |      | E2F      |
| ATTCGGCC | <<1.0E-15 |      | AIRE     |
| CTCCGGCA | <<1.0E-15 |      | AP2ALPHA |
| AGCCGAAG | <<1.0E-15 |      | PU1      |
| CAGCGGAG | <<1.0E-15 |      | PAX5     |
| AGCCGCTT | <<1.0E-15 |      | E2F      |
| AAGCGCAG | <<1.0E-15 |      | HNF4     |
| CTCCGAGC | <<1.0E-15 |      | NRSE     |
| ACCCGCAG | <<1.0E-15 |      | AP2      |
| CCTCGGAA | <<1.0E-15 |      | NRSE     |
| CCTCGTTC | <<1.0E-15 |      | VDR      |
| ACACGTAC | <<1.0E-15 |      | HIF1     |
| CACCGAGA | <<1.0E-15 |      | CDPCR3   |
| CTCCGGTC | <<1.0E-15 |      | AP4      |
| GGGCGGAA | <<1.0E-15 |      | SP1      |

(B) Strong Enhancer

**Figure S5** Sequence motifs surrounding mCpGs in regulatory regions. Additional 20 significant overrepresented motifs and their best matched TF binding sites are listed. (A) Active promoter (B) Strong enhancer.
